# Supplementary material
Source: PubMed Central journal article supplement (PMC10183359)

### Control OT

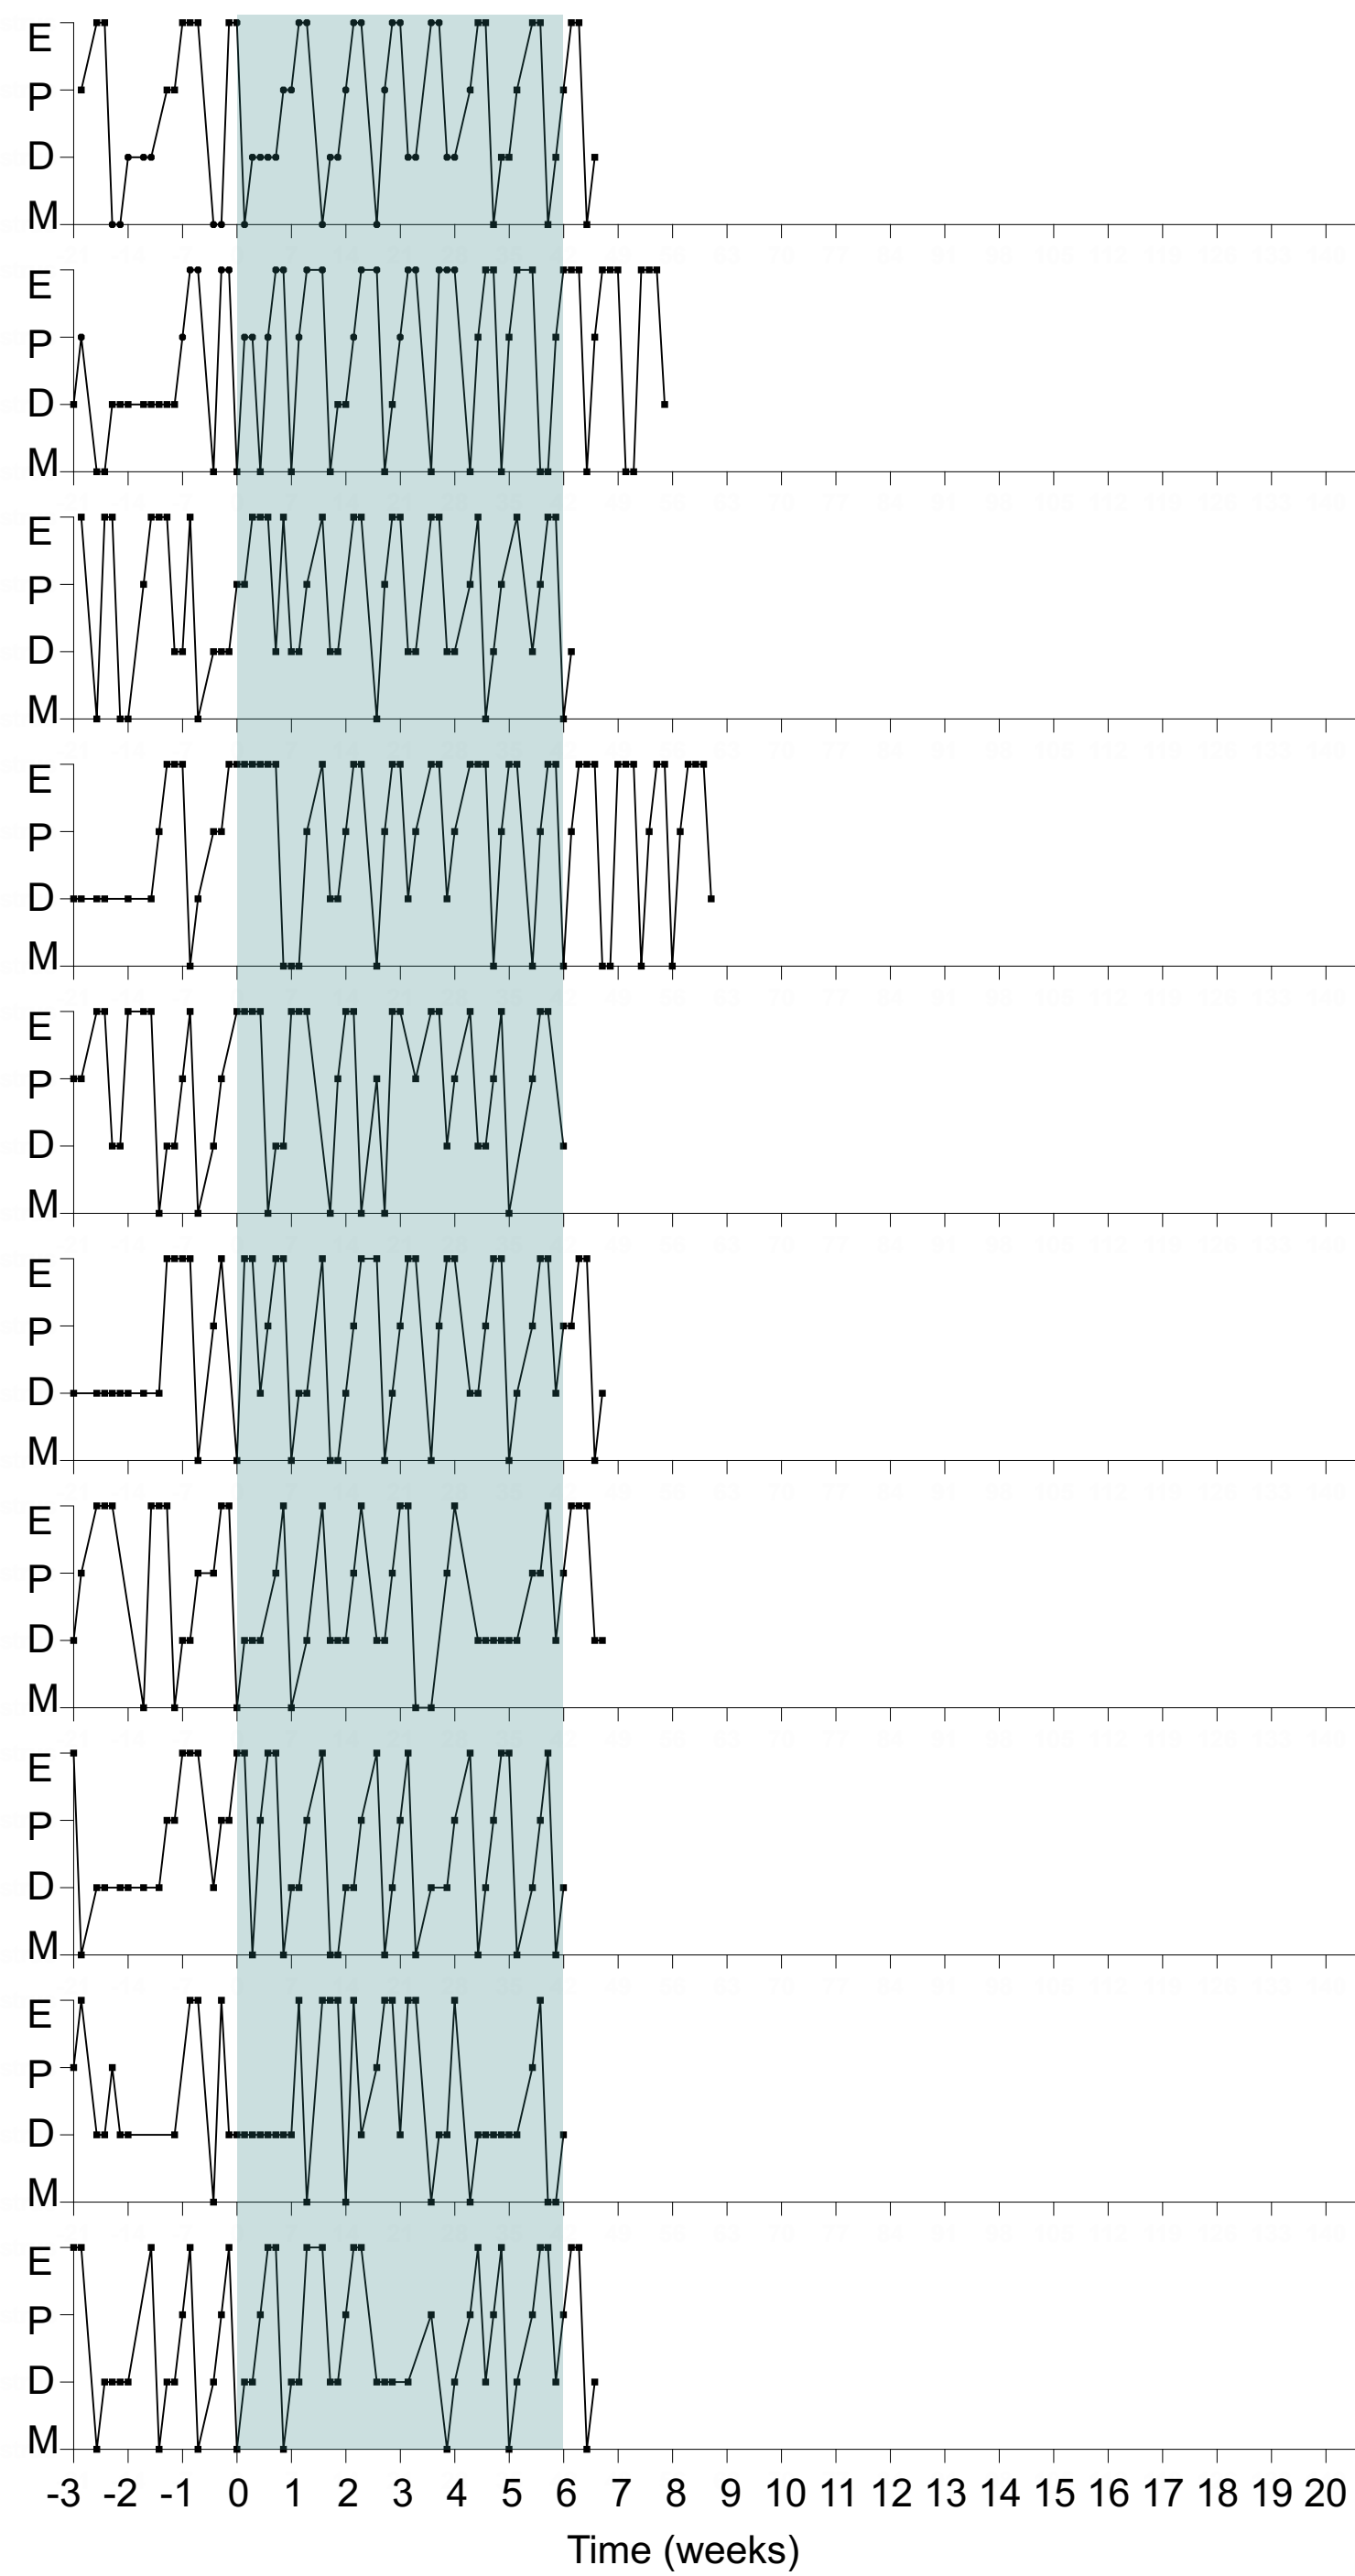

### On T

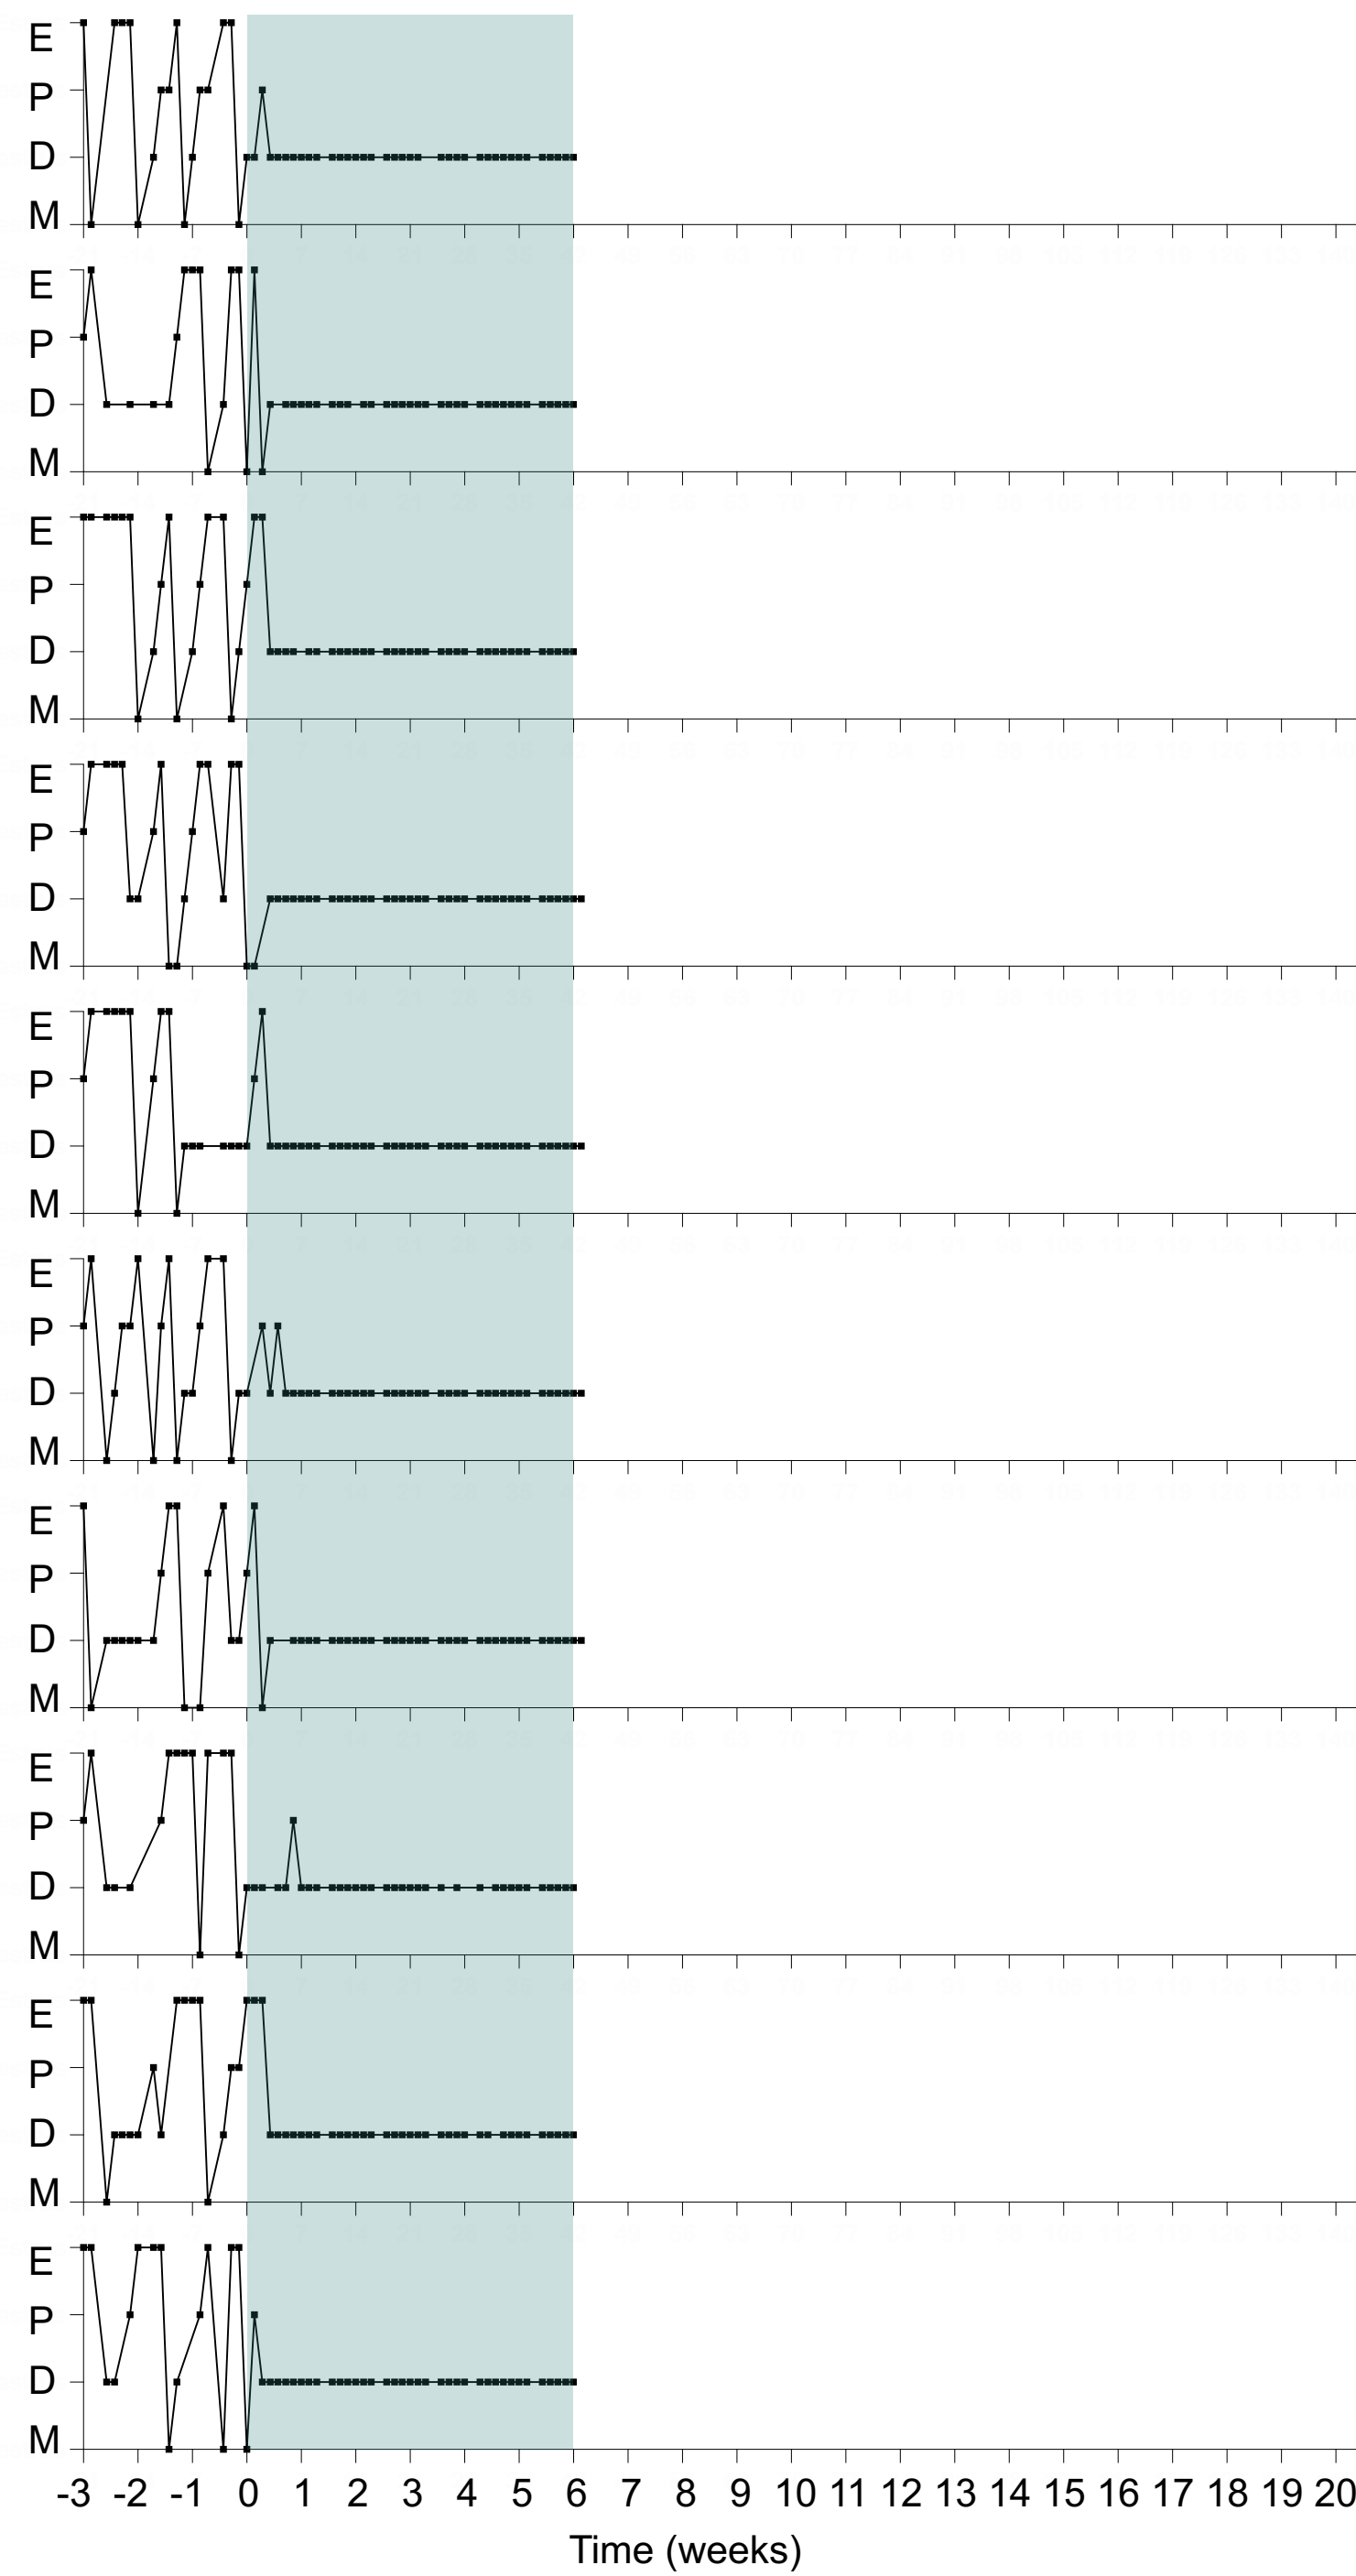

### Post T

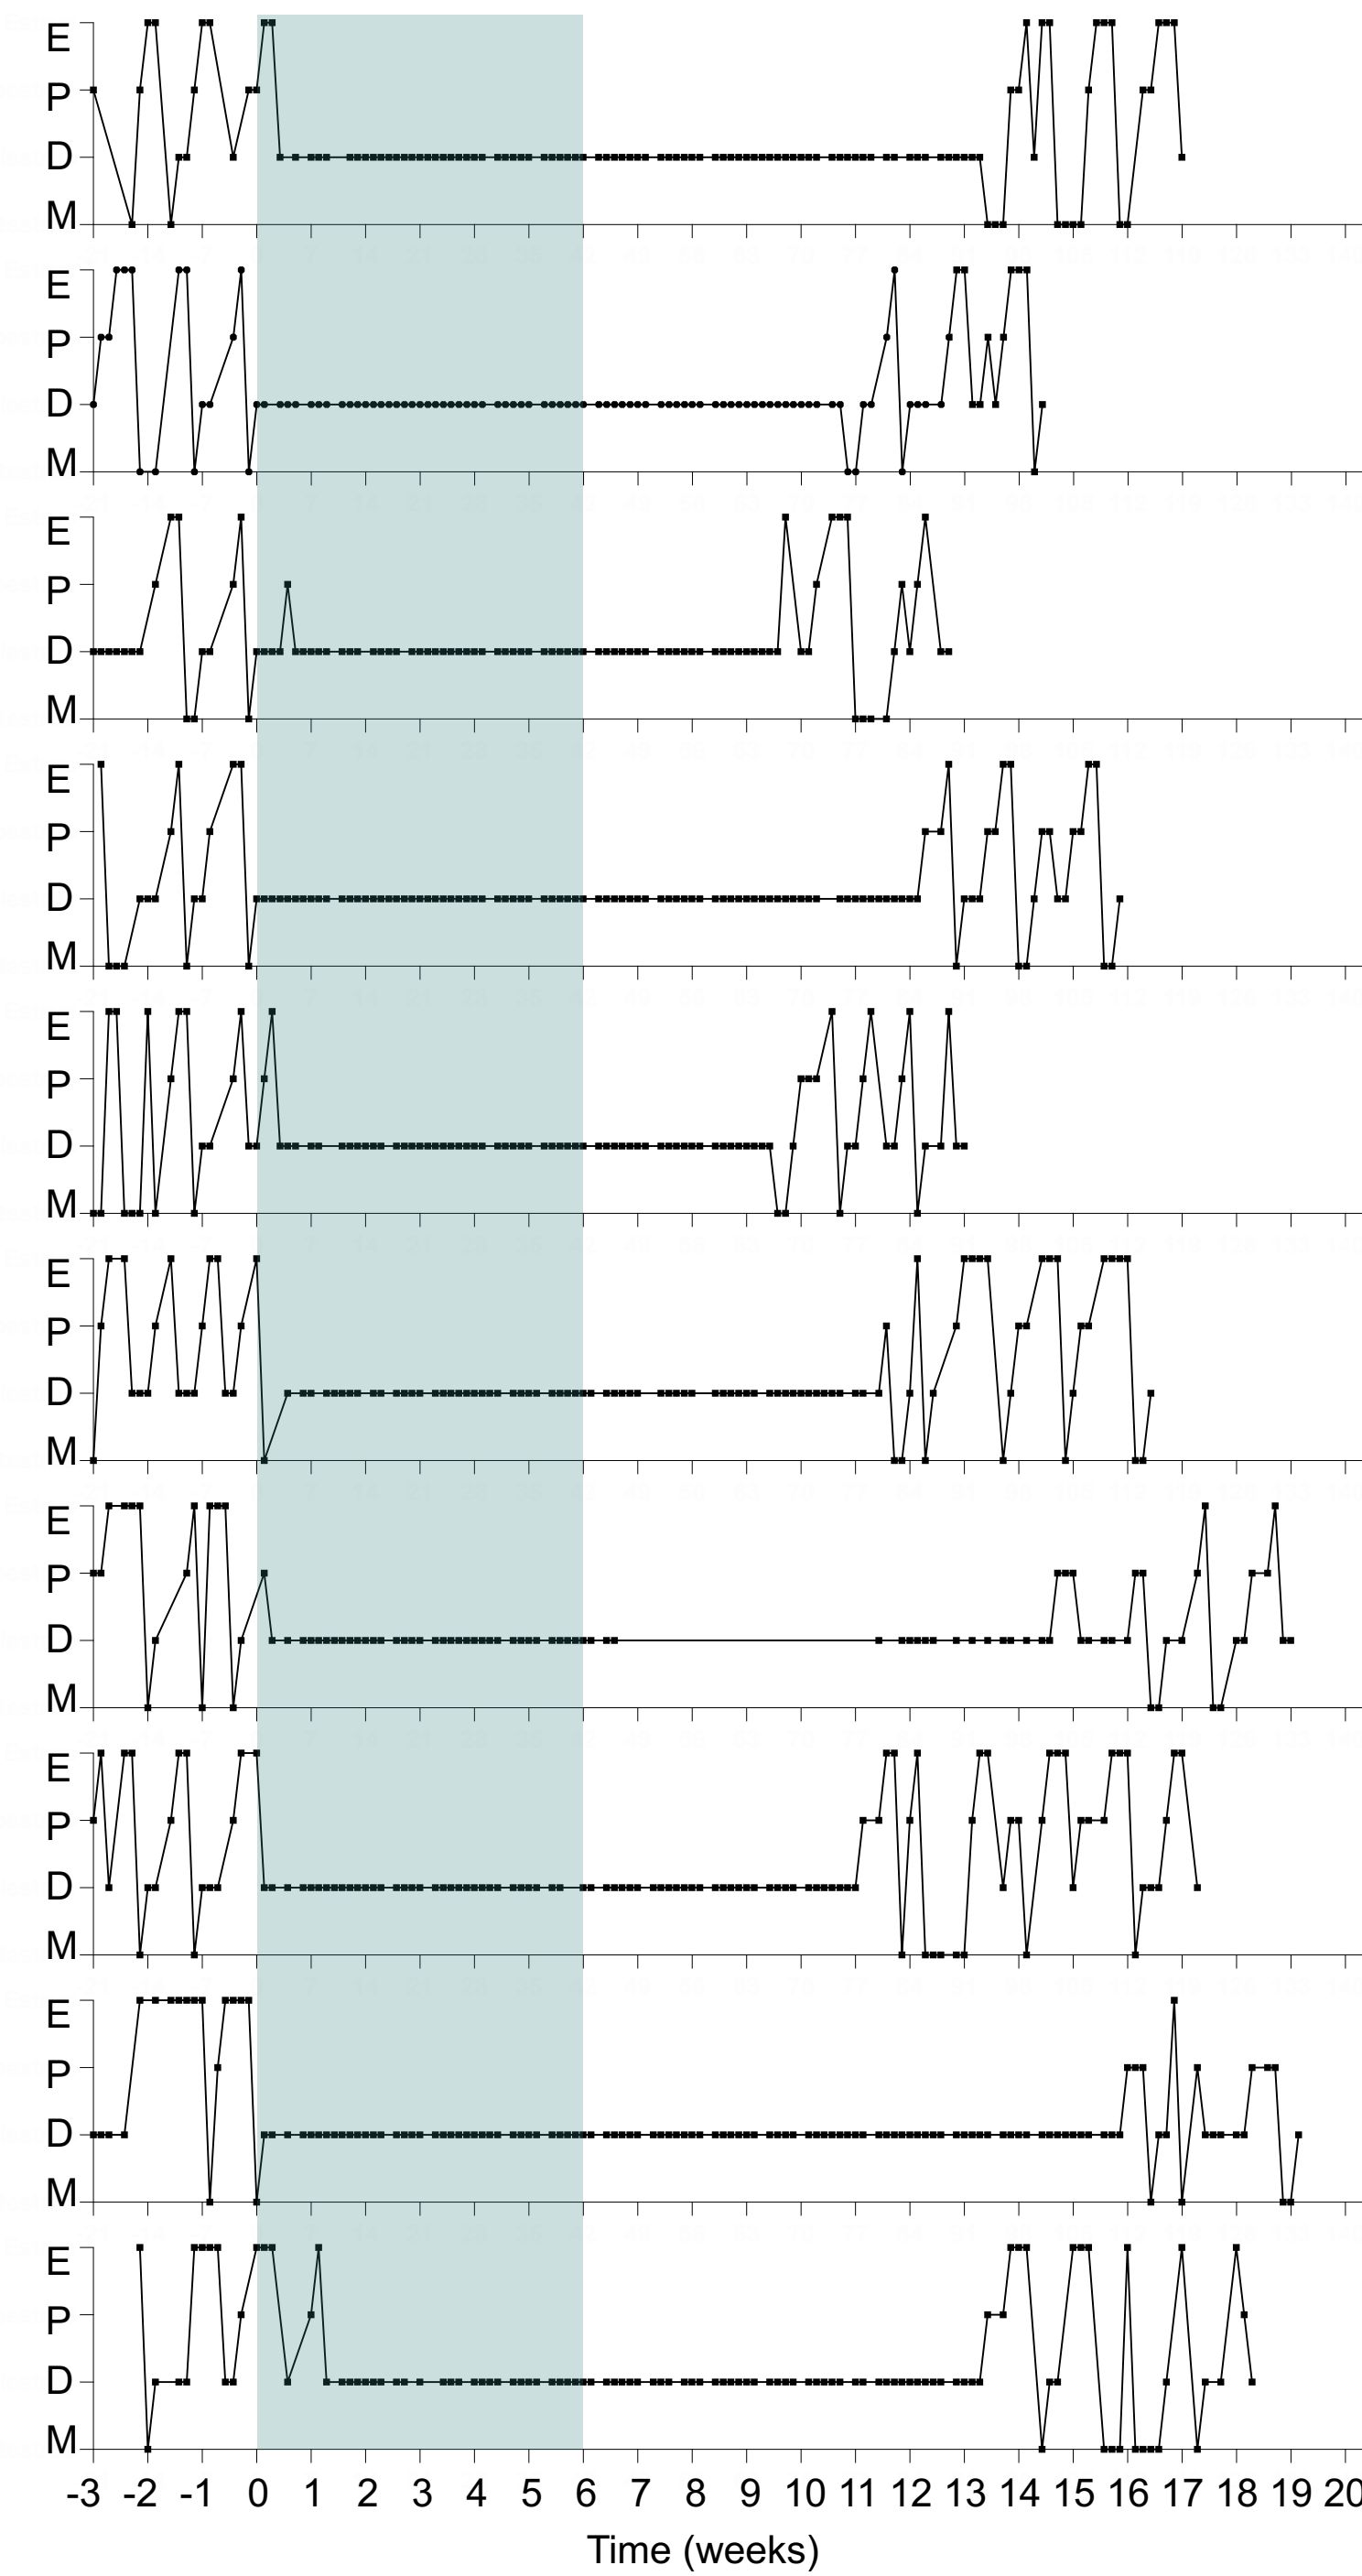

### Control PT

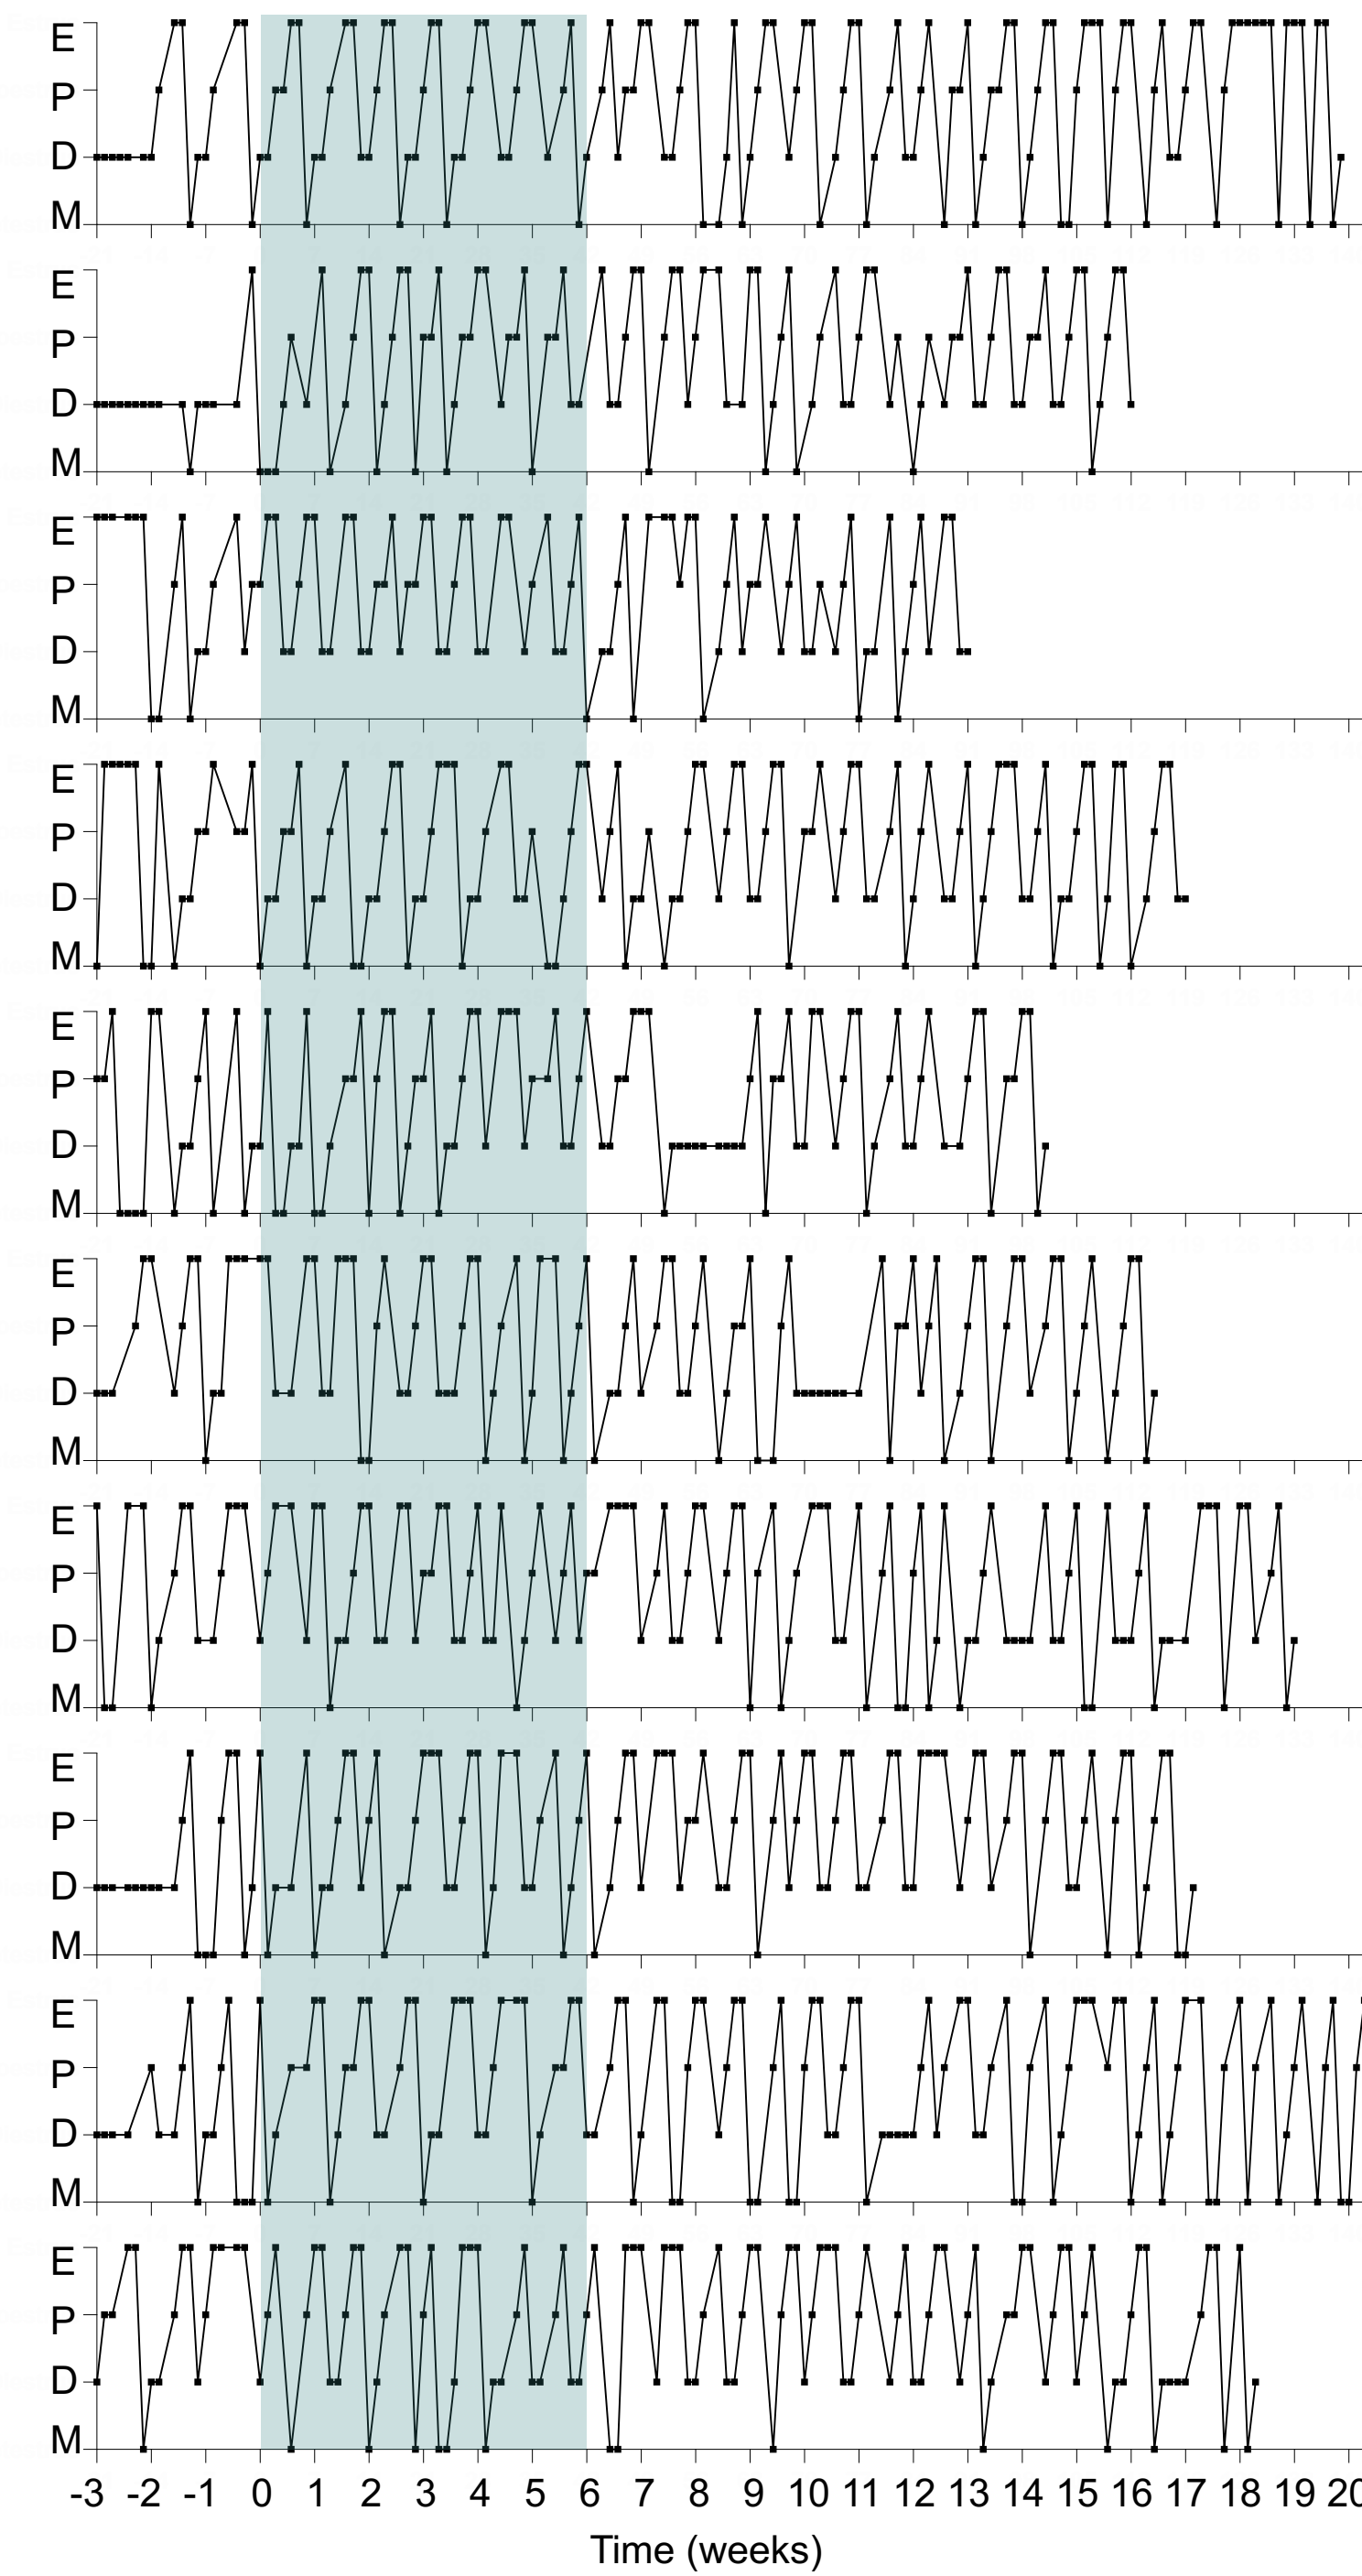

Supplement: kinnear_supp1_ioad019.pdf [file kinnear_supp1_ioad019.pdf]
